# Supplementary material for: DRIVE v1.0: A data-driven framework to estimate road transport emissions and temporal profiles
Source: Copernicus journal article supplement (doi:10.5194/egusphere-2025-753), 2025-04-10
Supplement: Supplementary file [file egusphere-2025-753-AC2-supplement.pdf]

Dear reviewer,

We highly appreciate your valuable feedback and comments, which help us significantly improve our MS. We would like to thank you very much for your detailed evaluation, in which you positively acknowledge our workflow, the data source description, and the political relevance. We particularly welcome your methodological suggestions for expanding the diagnostics, quantifying potential biases, and clarifying assumptions related to the presented emission estimates. Please find our response to your comments below.

1. Reviewer comment: In Section 2.3 (p. 9), LOS thresholds are tuned so that VKT shares match national FCD data within 1%. This calibration is critical for emission factor assignment, yet the actual threshold values per road class and the pre-/post-VKT distribution are not presented. Please report these in the main text. In addition, discuss whether using national FCD distributions for an urban network dominated by signalized intersections introduces systematic bias, and quantify the sensitivity of NO<sub>x</sub> and CO to a  $\pm 10\%$  shift in all thresholds.

**Response:** We moved Table S2 from the supplements to the main text, which shows the calibrated VCR thresholds and the nominal thresholds derived from HBS, 2015, which served as the starting point. The resulting distribution of the total VKT to different traffic conditions (LOS classes) is presented in Figure 5b for all years. Additionally, we introduce a new section, “Sensitivity to Specific Model Parameters”, which covers the proposed sensitivity analysis to a  $\pm 10\%$  shift in all thresholds.

Finally, we would like to note that distinct national distributions for rural and urban areas are available. We selected the distribution for urban areas, which was further clarified in the MS. While the volume-capacity ratio is just a simple proxy to estimate traffic conditions, we assume no systematic errors on a city level, thanks to the applied optimization of the VCR thresholds. This is briefly discussed in section 5.4 Limitations of the Uncertainty Assessment.

|     |                                                                                                                                                                                                                                                                                                                                                                                                                                                                                                                                                                                                                                                                                                                                                                                                                                                                                                                                                                                                                                                                                                                                                                                                                      |
|-----|----------------------------------------------------------------------------------------------------------------------------------------------------------------------------------------------------------------------------------------------------------------------------------------------------------------------------------------------------------------------------------------------------------------------------------------------------------------------------------------------------------------------------------------------------------------------------------------------------------------------------------------------------------------------------------------------------------------------------------------------------------------------------------------------------------------------------------------------------------------------------------------------------------------------------------------------------------------------------------------------------------------------------------------------------------------------------------------------------------------------------------------------------------------------------------------------------------------------|
| 214 | Schmaus et al. (2023) investigated the distribution of the vehicle kilometers traveled (VKT) among different LOS classes in Germany based on floating car data. He shows distinct distributions for rural areas and agglomerations, whereby we employed the distribution for agglomerations in this study. Although this corresponds to a national average for urban areas, we assume that it reflects the situation in Munich well.                                                                                                                                                                                                                                                                                                                                                                                                                                                                                                                                                                                                                                                                                                                                                                                 |
| 364 | <p>4 Sensitivity to Specific Model Parameters</p> <p>The approach is subject to fine-tuning of parameters and some heuristic assumptions that can affect the final emissions result. In the following section, we will examine the sensitivity of the estimate to changes in the VCR thresholds and the cold start allocation radius.</p> <p>4.1 Sensitivity Analysis of VCR Thresholds</p> <p>In section 2.3, we propose to optimize the VCR thresholds to match the national distribution of traffic situations on each road type within <math>\pm 1\%</math>. This step is crucial for selecting the correct emission factor, as emissions increase sharply and non-linearly in congested traffic conditions. We tested a scenario with <math>\pm 10\%</math> for all thresholds after the optimization, which is referred to as the nominal scenario. Table 6 shows the result of these scenarios and indicates that the emissions increase by 7 to 10 % if all VCR thresholds are lowered by 10 %, and the emissions decrease by 3 to 5 % if the thresholds are increased by 10 %. Raising the thresholds will lead to an increase in free-flow conditions by 7 %, and lower Stop&amp;Go conditions by 4 %.</p> |

Lowering results in a 7% decrease of VKT under free-flow conditions and a 6% increase of Stop&Go conditions. We conclude that a change in the thresholds and the associated distribution of VKT across the traffic situations has a severe impact on the resulting emissions, and the optimization must be conducted with great care. The distribution of VKT based on city-specific statistics or the allocation of traffic conditions based on floating car data would further increase local representativeness.

**Table 8.** Emission and VKT-distribution sensitivity to a  $\pm 10\%$  change of all VCR thresholds. The nominal scenario corresponds to the optimized threshold values used for the emissions calculation and shown in Table 4.

|                         | Emissions   |          |            | Traffic Situations |        |        |        |        |
|-------------------------|-------------|----------|------------|--------------------|--------|--------|--------|--------|
|                         | $CO_2$ [kt] | $CO$ [t] | $NO_x$ [t] | Freeflow           | Heavy  | Satur. | St&Go  | St&Go2 |
| <b>Nominal scenario</b> | 1287        | 2583     | 3333       | 53.4%              | 22.5%  | 16.3%  | 5.6%   | 2.2%   |
| <b>Thresholds -10%</b>  | 1403        | 2760     | 3664       | 46.6%              | 21.7%  | 17.6%  | 8.2%   | 6.0%   |
| <i>rel. change</i>      | + 9.0%      | + 6.9%   | + 9.9%     | - 6.8%             | - 0.9% | + 1.3% | + 2.7% | + 3.7% |
| <b>Thresholds +10%</b>  | 1226        | 2519     | 3153       | 60.1%              | 22.0%  | 14.2%  | 2.7%   | 1.0%   |
| <i>rel. change</i>      | - 4.7%      | - 2.5%   | - 5.4%     | + 6.7%             | - 0.5% | - 2.1% | - 2.9% | - 1.2% |

- Reviewer comment: Section 2.5 fixes a 1.5 km allocation radius based on an assumed travel time at 60 km/h. This assumption may not hold across all road types and congestion states. Please provide a sensitivity analysis (e.g., 0.8 km, 2.0 km) to show the impact on the spatial allocation of cold-start emissions. Also, all temperature binning uses a single urban station. Given the size of the domain, is this representative? Finally, Figure 8 and p. 16 note negative NOx cold-start factors above 25°C. Clarify whether such negative factors can lead to negative hourly or link-level totals and whether you impose a non-negativity constraint.

**Response:** We further analyse the sensitivity to the applied allocation radius in a new section, “Sensitivity to Specific Model Parameters”.

We briefly discuss the limited temperature representativeness in Section 2.5.

Finally, we clarify how cold-start surcharges can be negative above 25°C in the related figure caption.

- |     |                                                                                                                                                                                                                                                                                                                                                                                                                                                                                                                                                                                                         |
|-----|---------------------------------------------------------------------------------------------------------------------------------------------------------------------------------------------------------------------------------------------------------------------------------------------------------------------------------------------------------------------------------------------------------------------------------------------------------------------------------------------------------------------------------------------------------------------------------------------------------|
| 235 | This measured temperature is not fully representative of every vehicle start in the study area, but it does provide a practical, time-resolved reference value in Munich for the application of the emission factors. Further influences, such as the parking location of the vehicle (e.g., underground garage, carport, street parking), cannot be examined in detail.                                                                                                                                                                                                                                |
| 348 | (figure caption)<br>Negative cold start surcharges for NOx and NO2 are plausible, as these only represent a surcharge to the hot emissions. This means that in this case, the emissions during cold start are lower than the hot emissions. Overall, there are no negative emissions.                                                                                                                                                                                                                                                                                                                   |
| 364 | 4.2 Sensitivity Analysis of Cold-Start Allocation Radius<br>The number of vehicle starts is distributed across spatial zones in the traffic model and available for PC and LCV. We assign vehicle starts to all intersecting road links within the zone and a surrounding 1.5 km buffer radius, weighted by the traffic volume of the respective road link. Motorways and primary roads are generally excluded. To test the influence of the allocation radius, two additional scenarios with a 0.8 km and a 2 km buffer radius were tested. A study by Pina and Tchepel (2023) shows a typical driving |

distance of 5 km for inner-city journeys under cold start conditions, with excess emissions being highest at the start of the journey and then decreasing exponentially. We conclude that changing the allocation radius does not change the total emission at a policy-relevant level. Lowering the buffer radius generally leads to an increase in cold starts, attributed to residential roads as shown in Table 9. Figure 9 shows a difference map between allocated cold start emissions of the nominal scenario and 800 m and 2 km buffer radius, respectively. Larger differences are visible outside the city center, particularly for 800 m scenario. However, neither map shows a systematic correlation between the buffer radius and spatial distribution that could indicate an inadequate assumption, and the buffer distance has little influence on the city's total. The 1.5 km radius is applied until more conclusive information becomes available.

**Table 9.** Sensitivity of results when changing the cold start buffer radius. Total emissions change by less than 1 %.

|                         | Total Emissions      |                     |         | Road Types [starts/day] |             |
|-------------------------|----------------------|---------------------|---------|-------------------------|-------------|
|                         | CO <sub>2</sub> [kt] | NO <sub>x</sub> [t] | CO [t]  | Secondary               | Residential |
| <b>Nominal scenario</b> | 22.46                | 64.16               | 1549.23 | 2127309                 | 806793      |
| <b>Buffer = 0.8 km</b>  | 22.33                | 63.77               | 153975  | 2106709                 | 827393      |
| <i>rel. change</i>      | - 0.6 %              | - 0.6 %             | - 0.6 % | - 1.0 %                 | + 2.6 %     |
| <b>Buffer = 2 km</b>    | 22.67                | 64.75               | 1563.39 | 2137269                 | 796834      |
| <i>rel. change</i>      | + 0.9 %              | + 0.9 %             | + 0.9 % | + 0.5 %                 | - 1.2 %     |

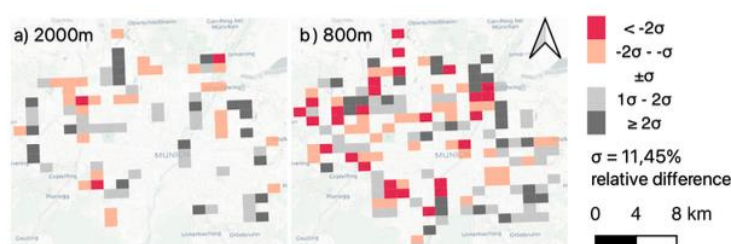

**Figure 9.** Relative difference in total cold start emission surcharges with an allocation buffer radius of a) 2 km and b) 800 m on a 1x1 km grid cell level. Larger relative differences can be observed outside the city center. However, no further systematic correlation between buffer radius and spatial distribution can be observed.

- Reviewer comment: The discussion on p. 15 attributes much of the CO difference with UBA and TNO to the assumed uniform 120 km/h motorway limit. While I understand that counter-based speed data have limitations, “unreliable” (Section 2.1.2) is too vague - please quantify coverage or bias. Even partial speed information could help construct a more realistic speed distribution. Consider adding a scenario with higher or unrestricted motorway speeds to estimate the impact on CO and report CO contributions by road class.

**Response:** Unfortunately, counter-based speed information is not available for any motorway section but only for inner-city stations (cp. Figure 1). We clarified this in section 2.1.2. The maximum speed limit of 120 km/h on the motorway is a model parameter of the macroscopic traffic model that we received from the city's mobility department. However, the speed limit on the motorway is variable and is controlled according to traffic volume, weather conditions, existing roadworks, or accidents. To further enrich our discussion in section 3.3, we show the contribution of CO from the motorway to the total hot exhaust emissions in 2019 and estimate an additional scenario with the aggregated EF for the road category “Motorway”.

|     |                                                                                                                                                                                                                                                                                                                                                                                                                                                                                                                                                                                                                                                                                                                                                                                                                                                                                                                                                                                                                   |
|-----|-------------------------------------------------------------------------------------------------------------------------------------------------------------------------------------------------------------------------------------------------------------------------------------------------------------------------------------------------------------------------------------------------------------------------------------------------------------------------------------------------------------------------------------------------------------------------------------------------------------------------------------------------------------------------------------------------------------------------------------------------------------------------------------------------------------------------------------------------------------------------------------------------------------------------------------------------------------------------------------------------------------------|
| 121 | Some stations also provide the average speed of vehicles, but this data is not used in the model as it was deemed unreliable. We observed numerous artifacts and outliers in the speed data, which we attributed to stop-and-go traffic, intersection effects, and maintenance issues. Moreover, there is no speed information available for the motorway (BAST counters), which makes it impractical to use this data consistently for all major road types.                                                                                                                                                                                                                                                                                                                                                                                                                                                                                                                                                     |
| 327 | The motorway accounts for approximately one-third of the total VKT in this study, and 40% of the total hot exhaust emissions (total hot CO = 2583 tons; motorway hot CO = 1032 tons). Motorway-type road links in the traffic model used have a maximum speed limit of 120 km/h. In reality, however, the allowed speed is regulated depending on the traffic load, and on German motorways at free-flow conditions, no speed limit is applied. To further evaluate the impact of high free-flow speeds on the motorway, we applied the national, aggregated emission factor for motorways to all motorway road links in our study. This triples the CO contribution from the motorway (motorway hot CO = 3539 tons), resulting in a total CO emission of 6701 t and a CO <sub>2,ff+bf</sub> /CO ratio 195.8. This suggests that we probably underestimate CO emissions on the highway, while methods based on proxies overestimate the urban share, where motorway speeds are generally lower due to high loads. |

4. Reviewer comment: The mapping from 8+1 counter classes to HBEFA categories is in Appendix B2 but is central to your method. This should be moved into the main paper or SI. The spatial correction factor  $\kappa$  is derived from weekday averages; please comment on whether this remains valid for weekends/holidays. If possible, validate  $\kappa$ -corrected class shares at the 64 independent stations, not only total volumes.

**Response:** According to your suggestion, we split Table B2 and moved the vehicle category characterization to Section 2.1.3, and the PCU scaling factors to Section 2.3.

To test the spatial correction on weekend days, we validated the  $\kappa$ -corrected modelled daily vehicle-specific traffic volumes against daily traffic counts for 2019. We colorize different road types and sub-select weekdays and weekend days. The result was added and discussed in the supplement Section 4. From the analysis, we conclude that the spatial correction is valid on weekend days.

| 138                      | <p><b>Table 1.</b> Aggregation of vehicle categories from 8+1 counting data categorization to HBEFA compatible vehicle classes.</p> <table> <tr> <th>8+1 vehicle class</th><th>HBEFA vehicle class (<i>vc</i>)</th></tr> <tr> <td>Passenger Car</td><td rowspan="2">PC - Passenger Car</td></tr> <tr> <td>Passenger Car w. Trailer</td></tr> <tr> <td>Motorcycles</td><td>MOT - Motorcycles</td></tr> <tr> <td>Light Truck</td><td>LCV - Light Commercial Vehicle</td></tr> <tr> <td>Truck</td><td rowspan="3">HGV - Heavy Goods Vehicles</td></tr> <tr> <td>Truck w. Trailer</td></tr> <tr> <td>Truck w. Semi-Trailer</td></tr> <tr> <td>Bus</td><td>BUS - Coach</td></tr> <tr> <td>Not Classified</td><td>-</td></tr> </table> | 8+1 vehicle class | HBEFA vehicle class ( <i>vc</i> ) | Passenger Car | PC - Passenger Car | Passenger Car w. Trailer | Motorcycles | MOT - Motorcycles | Light Truck | LCV - Light Commercial Vehicle | Truck | HGV - Heavy Goods Vehicles | Truck w. Trailer | Truck w. Semi-Trailer | Bus | BUS - Coach | Not Classified | - |
|--------------------------|----------------------------------------------------------------------------------------------------------------------------------------------------------------------------------------------------------------------------------------------------------------------------------------------------------------------------------------------------------------------------------------------------------------------------------------------------------------------------------------------------------------------------------------------------------------------------------------------------------------------------------------------------------------------------------------------------------------------------------|-------------------|-----------------------------------|---------------|--------------------|--------------------------|-------------|-------------------|-------------|--------------------------------|-------|----------------------------|------------------|-----------------------|-----|-------------|----------------|---|
| 8+1 vehicle class        | HBEFA vehicle class ( <i>vc</i> )                                                                                                                                                                                                                                                                                                                                                                                                                                                                                                                                                                                                                                                                                                |                   |                                   |               |                    |                          |             |                   |             |                                |       |                            |                  |                       |     |             |                |   |
| Passenger Car            | PC - Passenger Car                                                                                                                                                                                                                                                                                                                                                                                                                                                                                                                                                                                                                                                                                                               |                   |                                   |               |                    |                          |             |                   |             |                                |       |                            |                  |                       |     |             |                |   |
| Passenger Car w. Trailer |                                                                                                                                                                                                                                                                                                                                                                                                                                                                                                                                                                                                                                                                                                                                  |                   |                                   |               |                    |                          |             |                   |             |                                |       |                            |                  |                       |     |             |                |   |
| Motorcycles              | MOT - Motorcycles                                                                                                                                                                                                                                                                                                                                                                                                                                                                                                                                                                                                                                                                                                                |                   |                                   |               |                    |                          |             |                   |             |                                |       |                            |                  |                       |     |             |                |   |
| Light Truck              | LCV - Light Commercial Vehicle                                                                                                                                                                                                                                                                                                                                                                                                                                                                                                                                                                                                                                                                                                   |                   |                                   |               |                    |                          |             |                   |             |                                |       |                            |                  |                       |     |             |                |   |
| Truck                    | HGV - Heavy Goods Vehicles                                                                                                                                                                                                                                                                                                                                                                                                                                                                                                                                                                                                                                                                                                       |                   |                                   |               |                    |                          |             |                   |             |                                |       |                            |                  |                       |     |             |                |   |
| Truck w. Trailer         |                                                                                                                                                                                                                                                                                                                                                                                                                                                                                                                                                                                                                                                                                                                                  |                   |                                   |               |                    |                          |             |                   |             |                                |       |                            |                  |                       |     |             |                |   |
| Truck w. Semi-Trailer    |                                                                                                                                                                                                                                                                                                                                                                                                                                                                                                                                                                                                                                                                                                                                  |                   |                                   |               |                    |                          |             |                   |             |                                |       |                            |                  |                       |     |             |                |   |
| Bus                      | BUS - Coach                                                                                                                                                                                                                                                                                                                                                                                                                                                                                                                                                                                                                                                                                                                      |                   |                                   |               |                    |                          |             |                   |             |                                |       |                            |                  |                       |     |             |                |   |
| Not Classified           | -                                                                                                                                                                                                                                                                                                                                                                                                                                                                                                                                                                                                                                                                                                                                |                   |                                   |               |                    |                          |             |                   |             |                                |       |                            |                  |                       |     |             |                |   |

212

**Table 3.** Passenger Car Equivalent (PCE) scaling factors  $n_{vc}$ . These factors are applied to adjust the mixed traffic stream for the size and flow impact of different vehicle categories.

| vehicle class $vc$ | PCE factor $n_{vc}$ |
|--------------------|---------------------|
| PC                 | 1                   |
| MOT                | 1                   |
| LCV                | 1                   |
| HGV                | 2.5                 |
| BUS                | 1.75                |

SI  
53

Upon request, the city department responsible argued that no LCV-specific calibration had been performed. Misclassifications between PC and LCV of the double loop traffic detectors could also play an important role. The fit is particularly worse at trunk roads where only double loop detectors are installed, compared to the motorway, where a more robust camera-based classification is in place. We are aware of the data-model mismatch, but we have more confidence in the traffic model.

SI  
69

4.1 Validation of modeled, vehicle-specific and  $\kappa$ -corrected daily traffic volumes  
To model the traffic volume on each road link, we apply road and vehicle class-specific temporal extrapolation to the average weekday traffic volume provided by the traffic model. In addition, vehicle-share correction factors  $\kappa$  were applied to account for different modal splits on the same road type (example: higher HGV share on the ring motorway vs. on radial motorways into the city). In Figure S4 and S5,  $\kappa$ -corrected, modeled vehicle count and daily counts from counting stations on the same road link are shown. Figure S4 shows the daily traffic volume for all weekdays in 2019. A good fit for SUM, PC, and HGV can be observed across all road types. LCV, MOT, and BUS have worse fit statistics and higher variance. This is related to the small daily counts of MOT and BUS and the already worse fit of LCV in the traffic model (cp. Figure S2). The modelled traffic volume underestimates MOT and BUS and overestimates LCV. Additionally, we observe no significant difference but only slightly lower R<sup>2</sup>-values for weekend days compared to weekdays. In particular for SUM, PC, and HGV, we conclude that  $\kappa$ -corrected daily traffic volumes are equally valid on weekdays and weekends.

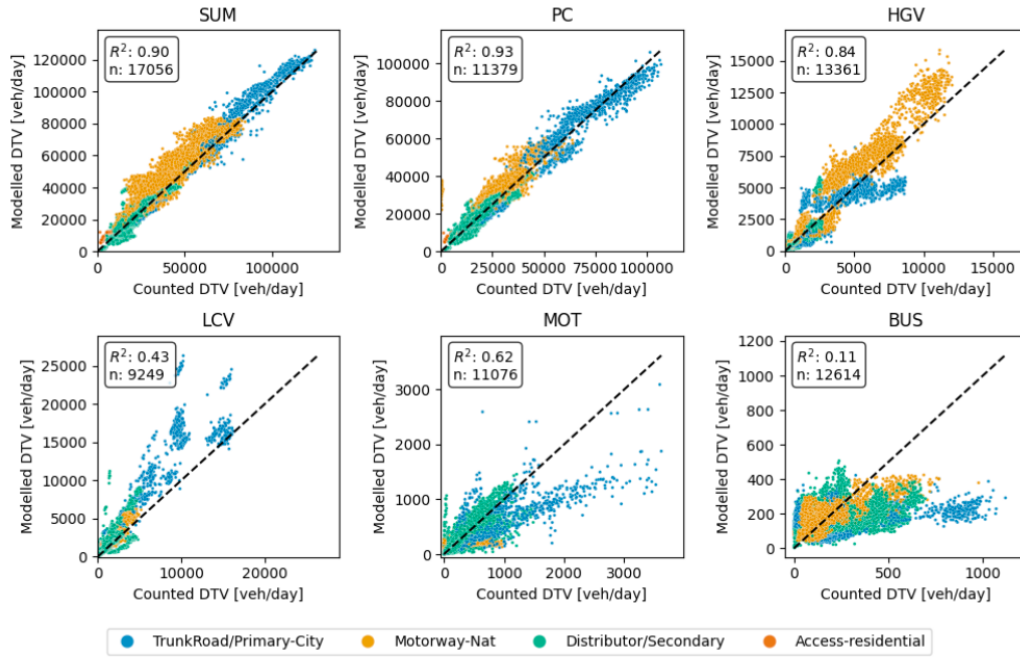

**Figure S5.** Comparison of  $\kappa$ -corrected modeled vs. counted daily traffic volume on weekdays (Monday-Friday). The daily modeled count for SUM, PC, and HGV shows a good fit and a high  $R^2$ . For MOT, bus, and LCV, the fit statistics are less satisfactory, which is attributed to lower counts and a poorer overall fit with the traffic model.

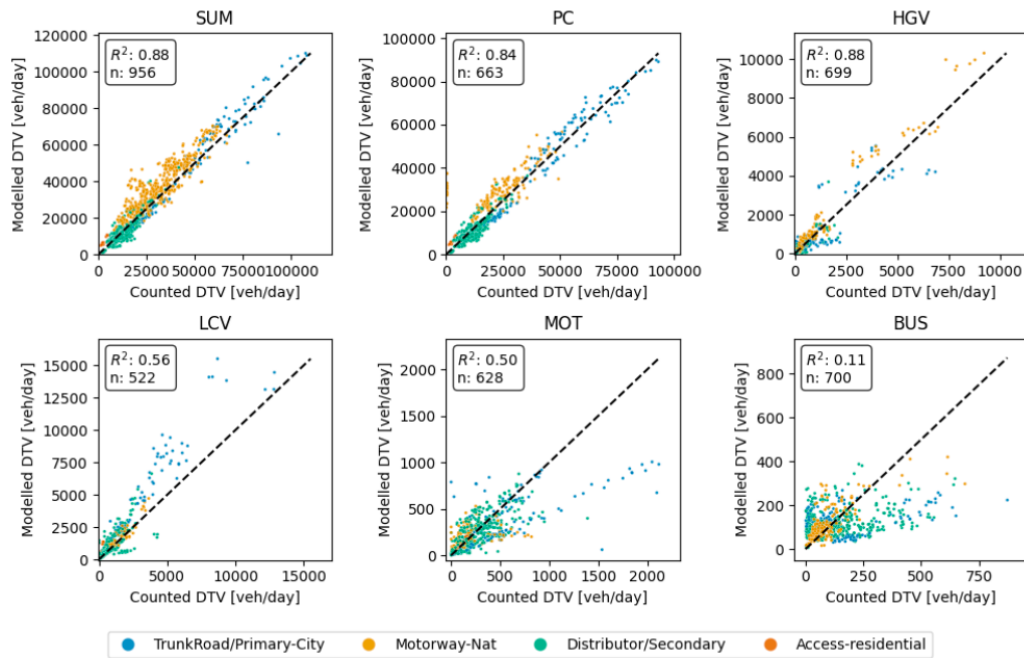

**Figure S6.** Comparison of  $\kappa$ -corrected modeled vs. counted daily traffic volume on weekend days (Saturday, Sunday). Compared to the weekday fit, we observe a similarly high agreement for SUM, PC, and HGV, and similar deviations for LCV, MOT, and BUS. We conclude that  $\kappa$ -corrected vehicle volumes are as valid on weekends as they are on weekdays.



5. Reviewer comment: Equation 6 combines activity error with emission factor uncertainty, assuming independence, yet EF depends on LOS, which is derived from activity. Please test a scenario with positively correlated perturbations (for example, correlation coefficient 0.3–0.5) to illustrate the possible underestimation of total uncertainty.

**Response:** Thanks for your suggestion. Neglecting the correlation between activity and emission factor selection is clearly a shortcoming of the presented analysis. The EF selection is based on the AD, but EFs are not a continuous variable. We use discrete volume-capacity thresholds to select traffic conditions and related EFs. The relationship between AD and EF is non-linear and cannot be determined analytically. A future plan for the method is to implement a Monte Carlo simulation or use floating car data or other speed measurements to estimate the traffic condition with an independent data source. We did not implement a test with positively correlated perturbations as, in our opinion, this would not lead to a conclusive result. We would like to draw the reviewer's attention to our section “5.4 Limitations of the Uncertainty Assessment”, where these and further issues are addressed.

|     |                                                                                                                                                                                                                                                                                                                                                                                                                                                                                                                                                                                                                                                                                                                                                                                                                                                                                                                                                                                                                                                                                                                                                                                                                                                                                                                                                                                                                                                                                                                                                                                                                                                                                                                                                                                                                                                                                                                                                                                                                                                                                                                                                                                                                                                                                                                                                                                                                                                                                                                                                                                                                                                                                        |
|-----|----------------------------------------------------------------------------------------------------------------------------------------------------------------------------------------------------------------------------------------------------------------------------------------------------------------------------------------------------------------------------------------------------------------------------------------------------------------------------------------------------------------------------------------------------------------------------------------------------------------------------------------------------------------------------------------------------------------------------------------------------------------------------------------------------------------------------------------------------------------------------------------------------------------------------------------------------------------------------------------------------------------------------------------------------------------------------------------------------------------------------------------------------------------------------------------------------------------------------------------------------------------------------------------------------------------------------------------------------------------------------------------------------------------------------------------------------------------------------------------------------------------------------------------------------------------------------------------------------------------------------------------------------------------------------------------------------------------------------------------------------------------------------------------------------------------------------------------------------------------------------------------------------------------------------------------------------------------------------------------------------------------------------------------------------------------------------------------------------------------------------------------------------------------------------------------------------------------------------------------------------------------------------------------------------------------------------------------------------------------------------------------------------------------------------------------------------------------------------------------------------------------------------------------------------------------------------------------------------------------------------------------------------------------------------------------|
| 438 | <p><b>5.4 Limitations of the Uncertainty Assessment</b></p> <p>The uncertainty analysis focuses only on hot vehicle exhaust emissions and does not consider cold start emissions due to the lack of comparable data. This approach is adequate for CO<sub>2</sub> and NO<sub>x</sub>, as these emissions are mainly generated when the engine is hot. For CO, strongly influenced by excess emissions during cold starts, the analysis likely underestimates the uncertainty because cold start emissions are more uncertain than hot emissions. Furthermore, on a city level, no specific information is available regarding the fleet composition, such as powertrain technologies and emission concepts, so statistical averages provided in HBEFA are used. These factors can vary significantly based on vehicle type, age, maintenance, and operating conditions, which may not be fully represented in a generalized dataset. Moreover, estimating traffic conditions using the volume capacity ratio is a simple, robust, and scalable method, yet it is not very accurate in urban road networks. The traffic flow is more often limited by the capacity of intersections than by the road links between them. The optimization applied (section 2.3) allows us to achieve a representative distribution of traffic conditions for the whole city on an annual average. However, we cannot explicitly account for congestion effects such as queues and spillbacks. Despite these limitations, we assume the volume capacity ratio provides a reasonably accurate estimate of traffic conditions on the road link. But, at a road link level, congestion may introduce more uncertainty than reported. Finally, we do not explicitly take the correlation between traffic activity and the emission factor into account. If the traffic activity is estimated inaccurately, it leads to an incorrect traffic condition, and subsequently, a wrong emission factor is applied. A sensitivity analysis quantifying the impact of this correlation could further clarify its influence. The level of uncertainty also exhibits a daily pattern: at night, when traffic activity is low, the likelihood of a traffic jam is also low. However, during the day, especially during peak hours, the chances of experiencing traffic jams increase significantly. In future work, conducting a Monte Carlo simulation that incorporates the uncertainties related to traffic activity and emission factors during specific time periods could enable a probabilistic representation of how uncertainties propagate and better quantify the uncertainty of the emissions estimate.</p> |
|-----|----------------------------------------------------------------------------------------------------------------------------------------------------------------------------------------------------------------------------------------------------------------------------------------------------------------------------------------------------------------------------------------------------------------------------------------------------------------------------------------------------------------------------------------------------------------------------------------------------------------------------------------------------------------------------------------------------------------------------------------------------------------------------------------------------------------------------------------------------------------------------------------------------------------------------------------------------------------------------------------------------------------------------------------------------------------------------------------------------------------------------------------------------------------------------------------------------------------------------------------------------------------------------------------------------------------------------------------------------------------------------------------------------------------------------------------------------------------------------------------------------------------------------------------------------------------------------------------------------------------------------------------------------------------------------------------------------------------------------------------------------------------------------------------------------------------------------------------------------------------------------------------------------------------------------------------------------------------------------------------------------------------------------------------------------------------------------------------------------------------------------------------------------------------------------------------------------------------------------------------------------------------------------------------------------------------------------------------------------------------------------------------------------------------------------------------------------------------------------------------------------------------------------------------------------------------------------------------------------------------------------------------------------------------------------------------|

6. Reviewer comment: Section 2.2 uses the same temporal factor for all minor roads due to lack of counters. This is a practical assumption but potentially introduces bias. Please provide an upper bound estimate of the VKT/NO<sub>x</sub> error this could cause. Also report the proportion of days filled by imputation and its effect on annual totals.

**Response:** While higher-level road types are well equipped with traffic stations, this information is lacking at lower-level roads. Therefore, we aggregate the counting data for temporal scaling as mentioned in Section 2.2. Initial exploratory analysis showed that diurnal profiles are similar for different road types but differ for vehicle classes. For annual profiles, again, different vehicle classes showed more distinct features than road types. We keep individual temporal scaling profiles for different vehicle classes and aggregate them to scaling road types as shown in

Table 1.

The total NO<sub>x</sub> share for the road type *Trunk Road/Primary-National* is 0.01% and 10.65% for the road type *Access-residential*. In our assessment, scaling the road using the proposed aggregated road types does not lead to any considerable distortion, and if it does, this would only affect a small share of emissions.

Table 1: Aggregation of traffic counting stations from different road types to three distinct scaling road types.

| Road Type                   | # Counters | Scaling Road Type     | # Counters |
|-----------------------------|------------|-----------------------|------------|
| Motorway-National           | 65         | Motorway              | 65         |
| Trunk Road/Primary-City     | 17         | Primary-City          | 17         |
| Trunk Road/Primary-National | 3          | Distributor/Secondary | 64         |
| Distributor/Secondary       | 60         |                       |            |
| Access-residential          | 1          |                       |            |

The proportion of days filled differs by road type, vehicle class, and year. For the timeframe of the study (2019 until 2022; 1461 days), we imputed between 0 and 88 (6.02%) days. Table 2 provides an overview. We do not expect an effect on the annual total by this imputation.

Table 2: Share of days filled for the timeframe of 2019 until 2022.

|                               | BUS    | HGV    | LCV    | MOT    | PC     | SUM    |
|-------------------------------|--------|--------|--------|--------|--------|--------|
| <b>Distributor/Secondary</b>  | 0 %    | 0.07 % | 0.07 % | 0 %    | 0 %    | 0 %    |
| <b>Motorway-National</b>      | 0 %    | 0.41 % | 0 %    | 0 %    | 0.21 % | 0.27 % |
| <b>TrunkRoad/Primary-City</b> | 2.46 % | 3.63 % | 3.97 % | 2.46 % | 5.54 % | 6.02 % |

7. Reviewer comment: Figure 9 shows systematic overestimation at high volumes. Please include a breakdown of errors by road class and LOS to help identify whether this bias is linked to particular conditions. Also, specify how many stations were excluded from validation and their spatial distribution.

**Response:**

While re-running the notebook to investigate the differences, we found an error when importing the counting data into the notebook. Before centrally defining all data paths in *data\_paths.py*, we explicitly imported data at the beginning of the notebook. The import filename was not changed in the related file where we calculated the activity and emission uncertainty, which led to importing old counting data (from 27.02.2024). In this old counting dataset, we collectively excluded all counting stations that did not provide data for all vehicle classes, leading to the exclusion of many counting stations along the motorway that only



provide total traffic volume counts in 2019. We actualized Figures 10 (previously Figure 9) and 11 (previously Figure 10) in the MS and Figure S2 in the supplements.

We assigned valid counting data to 82 road links within the city boundaries. The valid flag requires an SQV > 0.6 and data availability for 2019. A map of valid and ivalid flagged counting stations was added to the supplements (Figure S4)

Furthermore, we updated Figure 10 (previously Figure 9) to include a breakdown into different road classes and discuss it in the MS.

A breakdown by LOS is generally not possible for daily and annual aggregated figures, as the traffic situation varies throughout the day and the year. In addition, the traffic situation is a function of traffic volume and varies depending on whether actual count data or modelled traffic volume is used as the basis for the calculation. Both may result in a different volume-capacity ratio and thus lead to different traffic situations. For these reasons, we did not implement the classification based on LOS as proposed.

SI

65

Figure S4 shows the spatial allocation of valid counting stations. In total, 82 road links have valid counting data assigned to them.

386

Figure 10 shows the analysis result. A systematic, overall positive bias can be observed for the hourly, daily, and annual traffic volume (Fig. 10 b, d, and f). Counting stations on Distributor/Secondary roads tend to show higher values, while the model slightly overestimates the traffic volume on primary city roads and the motorway with high traffic volumes. However, it is also possible that the traffic counting stations, which are taken as the ground truth in this analysis, underestimate the volume of traffic, particularly at high volumes, e.g., due to incorrect or missing counts, or the malfunctioning of individual detectors.

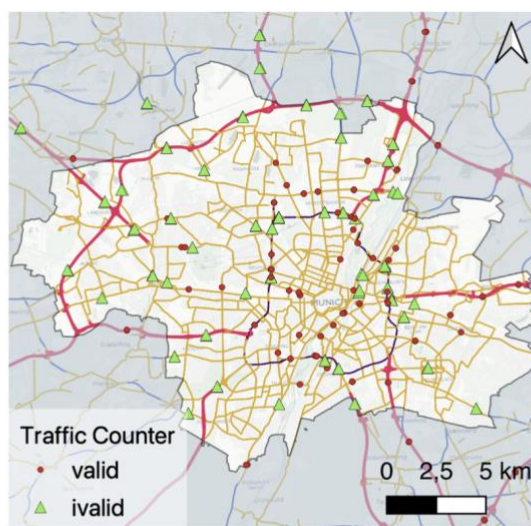

**Figure S4.** Classification and spatial allocation of "valid" and "invalid" flagged traffic counting stations. Valid stations provide data for 2019 and have an SQV greater than 0.6. In total, 82 road links have valid traffic counting data assigned to them.

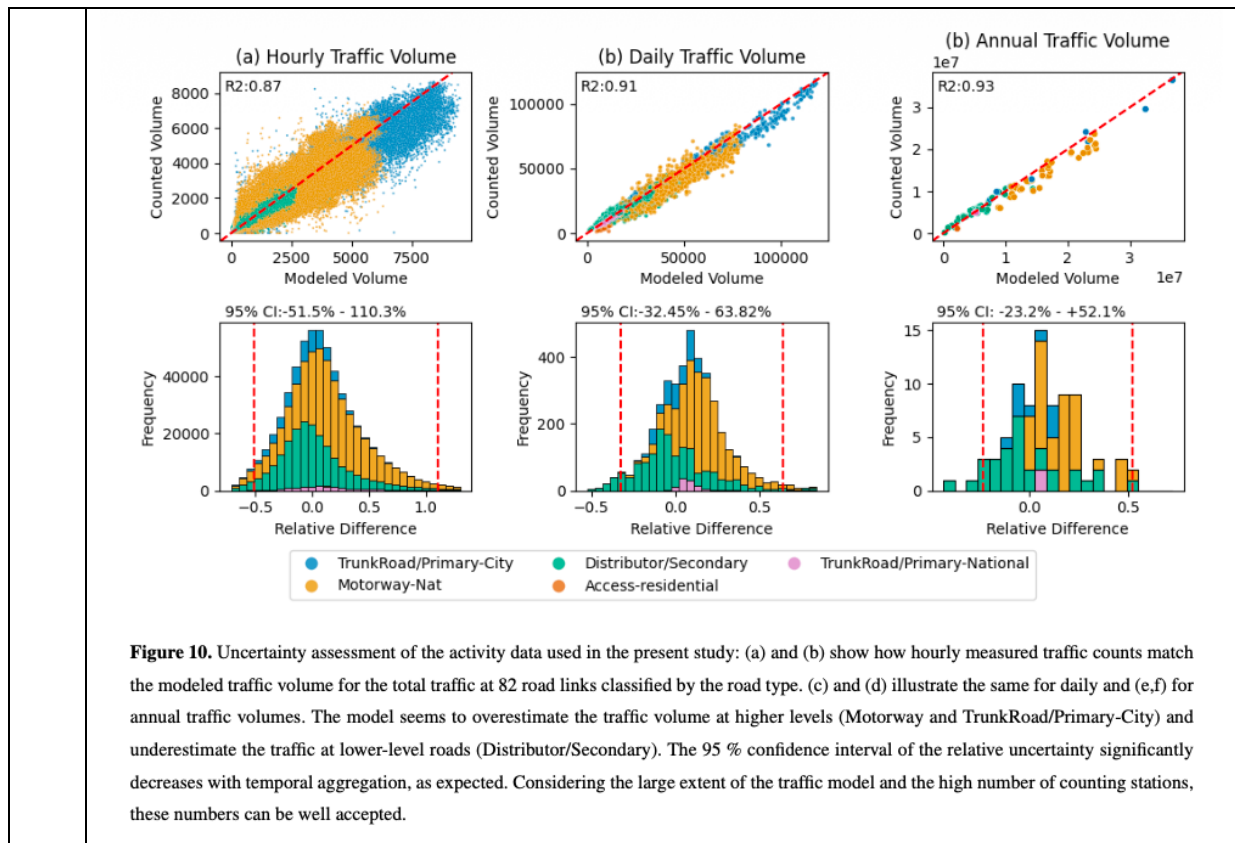

8. Reviewer comment: The comparison in Table 4 is useful but could be more diagnostic. Splitting differences by road class or simple urban/rural zones would help disentangle whether mismatches are driven by spatial allocation or by speed/EF assumptions.

**Response:** The UBA and TNO inventories are only available in a gridded form, which does not allow for disentangling differences at a road link level. To provide further diagnostics, we analysed which road type contributes the highest share of CO<sub>2</sub> emissions to each grid cell in our inventory. This results in five categories: “Motorway”, “Primary”, “Secondary”, “Residential”, and “None”. The “None” category indicates cells where no emissions were allocated in our inventory. The analysis was added to the table.

**Table 7.** Comparison of the total emission for fossil fuel  $CO_2$  ( $CO_{2,ff}$ ), fossil and biofuel  $CO_2$  ( $CO_{2,ff+bf}$ ),  $CO$  and  $NO_x$  from three different spatially explicit emission inventories in Munich (DRIVE, UBA, TNO). For this comparison, we selected the closest year available. The RKU estimate is the official number reported by the City of Munich and includes upstream emissions from the fuel supply chain (Scope 2). We compare the  $CO_{2e,WTW}$  (Well-to-Wheel) emission in this case. All other emissions are tank-to-wheel, i.e., Scope 1 emissions. In addition, the table contains total values for  $CO_{2,ff+bf}$  for subsets categorized according to the predominant road types in the grid cell. This suggests that UBA overestimates emissions at Secondary roads and TNO underestimates emissions on the Motorway.

| Component                    | Unit | DRIVE (2019) | UBA (2019) |        | TNO (2018) |       | RKU (2019) |         |
|------------------------------|------|--------------|------------|--------|------------|-------|------------|---------|
| $CO_{2,ff}$                  | kt   | 1248         | -          | -      | 946        | - 24% |            |         |
| $CO_{2,ff+bf}$               | kt   | 1312         | 1936       | + 47%  | 993        | - 24% |            |         |
| $CO$                         | t    | 4194         | 16250      | + 287% | 7671       | + 83% |            |         |
| $NO_x$                       | t    | 3434         | 5299       | + 54%  | 2946       | - 14% |            |         |
| $CO_{2e,WTW}$                | kt   | 1499         | -          | -      | -          | -     | 1592       | + 6.2 % |
| $CO_{2,ff+bf}$ , Motorway    | kt   | 513          | 551        | + 7%   | 235        | - 54% |            |         |
| $CO_{2,ff+bf}$ , Primary     | kt   | 220          | 263        | + 20%  | 170        | - 23% |            |         |
| $CO_{2,ff+bf}$ , Secondary   | kt   | 489          | 974        | + 99%  | 489        | 0%    |            |         |
| $CO_{2,ff+bf}$ , Residential | kt   | 27           | 94         | + 248% | 25         | - 7%  |            |         |
| $CO_{2,ff+bf}$ , None        | kt   | 0            | 53         | -      | 27         | -     |            |         |
| $CO_{2,ff+bf}/NO_x$          |      | 363.4        | 365.4      |        | 321.1      |       | -          |         |
| $CO_{2,ff+bf}/CO$            |      | 297.6        | 119.1      |        | 123.3      |       | -          |         |

## Sources

Forschungsgesellschaft für Straßen- und Verkehrswesen FGSV (Ed.). (2015). Handbuch für die Bemessung von Straßenverkehrsanlagen: HBS 2015. Teil S - Stadtstraßen (Ausg. 2015, Stand: 18.9.2015). FGSV-Verl.

Pina, N. and Tchepel, O.: A Bottom-up Modeling Approach to Quantify Cold Start Emissions from Urban Road Traffic, International Journal of Sustainable Transportation, 17, 942–955, <https://doi.org/10.1080/15568318.2022.2130841>, 2023.
